# Supplementary material
Source: PubMed Central journal article supplement (PMC7062569)

## SUPPLEMENTAL FIGURES

### **Supplemental Figure 1: IGF-1 saturation curves and expression of pan AKT, S6, IGFR in STHdh and PC12 cells.**

**A)** Representative western blot and quantification of pan IGFR and pan AKT in STHdh Q7/Q7 cells after 3hr, 50/500 $\mu$ M Mn<sup>2+</sup> exposure in Media or HBSS. **B)** Representative blot and quantification of p-AKT following 24hr exposure with 0.1-25nM IGF-1 in STHdh Q7/Q7 and Q111/Q111. **C)** Representative western blot of p-AKT, pan AKT, p-S6, and pan S6 in non-HTT induced PC12 cells following 24hr exposures with Mn<sup>2+</sup> (100 $\mu$ M), IGF (10nM), BMS-536924 (1 $\mu$ M), and/or LY294002 (7 $\mu$ M). Cells were treated with LY294002 (PI3K inhibitor, 7 $\mu$ M) as a negative control but data not quantified **D)** Representative western blot and quantification of p-AKT (Thr308) following 24hr exposure with Mn<sup>2+</sup> (50 $\mu$ M), IGF (10nM), and/or BMS-536924 (1 $\mu$ M) in STHdh Q7/Q7. **E)** Representative western blot of pan IGFR and pan AKT and quantification of pan AKT in STHdh cells following 24hr exposure with Mn<sup>2+</sup> (50 $\mu$ M), IGF (10nM), and/or BMS-536924 (1 $\mu$ M). N=3; Error bars= SEM; %= significant difference compared to vehicle by 95% CI \*= significant difference by Tukey's multiple comparison test. \*P<.05, \*\*P<.01, \*\*\*P<.001.

### **Supplemental Figure 2: Mn uptake after KB-R7943+Mn<sup>2+</sup> and representative western blot for 3T3 and HEK293 cells.**

**A)** Quantification of Mn uptake following 24hr, 25,50 $\mu$ M Mn exposures with or without 10 $\mu$ M KB-R7943 with WT and HD STHdh cells. Two-way ANOVA; treatment= F(3,6)=5.840; p=<0.0326; genotype= F(1,2)=127.9; p=0.0077. n=3. \*= significant by Sidak's multiple comparison. \*P<.05, \*\*P<.01, \*\*\*P<.001. **B)** Representative western blot of p-IGFR, p-AKT, and p-S6 for 3T3 and HEK293 cells following 1hr serum deprivation and 3hr exposure with Mn<sup>2+</sup> (100 $\mu$ M), IGF-1 (1nM), LY294002 (7 $\mu$ M), and/or Linsitinib (1 $\mu$ M) in HBSS.

### **Supplemental Figure 3: IGF-1 cannot stimulate pAKT expression in hiPSC-derived neuroprogenitors after 24hr exposure in conventional growth-factor (N2) containing media.**

**A)** Representative western blot of p-AKT and p-S6 treated with Mn<sup>2+</sup> (200 $\mu$ M), IGF (10nM), and/or BMS-536924 (100nM) under normal +N2 containing (insulin saturating) media in two control and one HD patient-iPSC-derived neuroprogenitors following 24hr treatment. **B, C)** Quantification of p-AKT (**B**) and p-S6 (**C**). Error bars= SEM; N=4 control; N=3 HD. **D)** Two-way ANOVA statistics from Fig 7.

### **Supplemental Figure 4: Representative western blots for hiPSC-derived neuroprogenitors.**

**A, B)** Representative western blot of hiPSC-derived neuroprogenitors from a control patient (CC3, **A**) and an HD patient (HD58, **B**) for p-IGFR, p-AKT, p-S6 following 3hr treatment with Mn<sup>2+</sup> (200/500 $\mu$ M) or Mn<sup>2+</sup>+IGF (1nM) and BMS-536924 (100nM, 1 $\mu$ M) BMS-754807 (2nm) in serum free media, after 3hr serum withdrawal. **C)** Representative western blot for pan IGFR, pan AKT, and pan S6. Same blot as Panel A. **D-F)** Quantification of pan IGFR (**D**), pan AKT (**E**), and pan S6 (**F**). Left set of conditions (veh, 200 $\mu$ M, 500 $\mu$ M, BMS754807+500 $\mu$ M) is with no IGF, right side is with 1nM IGF.-N=4; 2 control patients from 2 separate differentiations.

## SUPPLEMENTAL FIGURES (Cont'd)

**Supplemental Figure 5: Western blot quantification for hiPSC-derived neuroprogenitors. A, B** Quantification of p-IGFR, p-AKT, and p-S6 in control (**A**) or HD (**B**) hiPSC-derived neuroprogenitors after no treatment (trace IGF) or stimulation with IGF-1 alone (1nM) for 3hrs, following 3hr serum deprivation. **C, D** Quantification of p-IGFR, p-AKT, and p-S6 in control (**C**) or HD (**D**) hiPSC-derived neuroprogenitors after treatment with BMS-536924 (100nM, 1 $\mu$ M) or BMS-754807 (2nM) alone for 3hrs, following 3hr serum deprivation in either trace IGF or 1nM IGF only containing conditions (no Mn<sup>2+</sup>).

**Supplemental Figure 6: IGFR/IR inhibitors block the majority of Mn-induced p-AKT.** Quantification of degree of Mn<sup>2+</sup>-induced p-AKT, p-IGFR, and p-S6 inhibition using IGFR/IR inhibitors in WT STHdh (**A**), non-striatal cells (HEK293, 3T3, PC12) (**B**), and hiPSC-derived striatal-like neuroprogenitors (**C**)- quantified from data in Figures 5, 6, and 8. The name, concentration, and IC50 of inhibitors used is listed followed by the percentage of inhibited Mn<sup>2+</sup>-induced p-AKT, p-IGFR, and p-S6 expression after inhibitor treatment (Mean $\pm$ Stdev). For B, C an inhibition correlation score is also calculated (%pAKT or p-S6 inhibition)/(%pIGFR/IR inhibition).

**Supplemental Figure 7: Quantification of phosphorylated protein expression by (phospho/Coomassie) or (phospho/pan/Coomassie) do not significantly differ (p-values for difference between normalization methods, Coomassie vs pan, are noted on each graph and **bolded** here in this legend).** A) Quantification of p-AKT after 3hr, 50/500 $\mu$ M Mn<sup>2+</sup> exposure in serum free HBSS (following 1hr serum deprivation) or media containing 10% FBS. Data was normalized as p-AKT/panAKT/Coomassie. Data is taken from the same samples as Fig 1B as a direct comparison. Two-way ANOVA; treatment= F(2,4)=10.64; p=0.0250; normalization type= F(1,2)=0.005268; **p=0.9487** B) Quantification of p-AKT (Thr308, not Ser473) after exposure with 50 $\mu$ M Mn, 10nM IGF, or both for 24hrs. Data is normalized as p-AKT/coomassie or p-AKT/panAKT/coomassie and plotted on the same graph for direct comparison. n=3 for all experiments. Two-way ANOVA; treatment= F(1,432,5.726)=31.57; p=0.0011; genotype= F(3,12)=3.833; p=0.0389; normalization type= F(3,12)=1.183; **p=0.3574** C) Quantification of p-AKT (C), p-S6 (D), and p-IGFR (E) expression after 3hr exposures in serum-free HBSS with or without 1nM IGF. Data used here is taken from a subset of the same samples used in Fig 7, 8. Phosphorylated expression in control cells is normalized as phos/coomassie (dark blue) or phos/pan/coomassie (light blue) and plotted on the same graph. Two-way ANOVA for C) treatment=F(11, 22)=10.71; p=<0.0001; normalization type=F(1, 2)=2.648 ; **p=0.2452**. D) treatment= F (11, 33) = 4.557; p=0.0003; normalization type= F(1, 3)=1.157; **p=0.3609**. E) treatment= F(11, 22)=3.890 ; p=0.0032; normalization type= F(1, 2)=2.630; **p=0.2463**. **F, G** Percent of protein remaining after Mn<sup>2+</sup> exposures (200, 500 $\mu$ M) for 3 hours in STHdh (**F**) and hiPSC-derived neuroprogenitors (**G**) as a cell viability readout. N=4. Error= 95% CI. Normalized to vehicle treated for each genotype. H) Mn uptake in STHdh cells after 24hr Mn<sup>2+</sup> exposure with 25-100 $\mu$ M Mn<sup>2+</sup>. Two-way ANOVA for H) treatment=F(3,6)= 236.7; p=<0.0001; genotype=F(1,2)=52.94; p=0.0184. \*= significant differences by Sidak's post hoc analysis. All data except F, G are plotted as SEM. N=3 for all experiments except F, G.

**A**

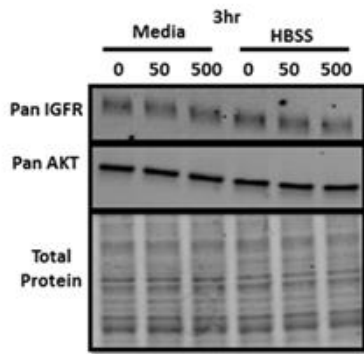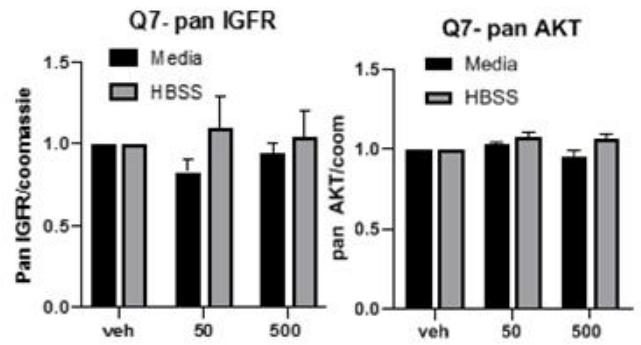

**B**

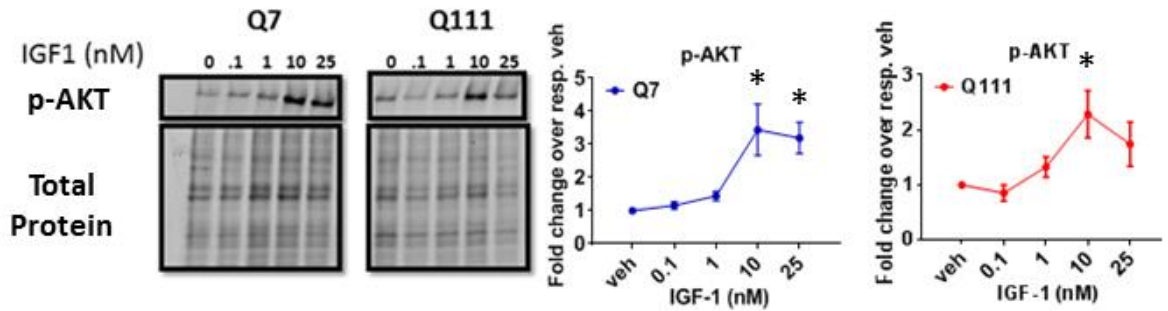

**C**

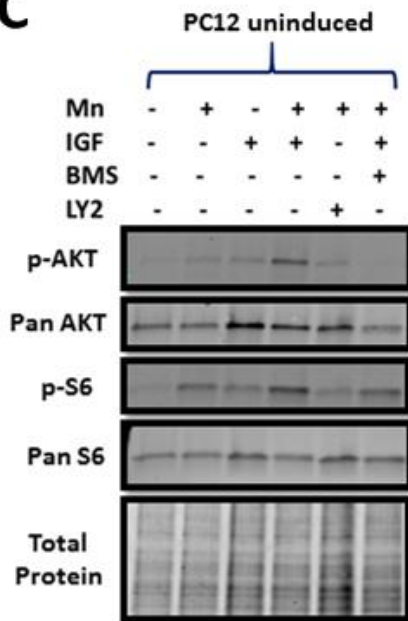

**D**

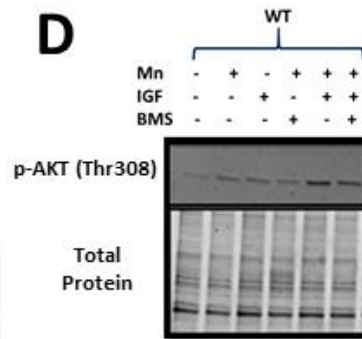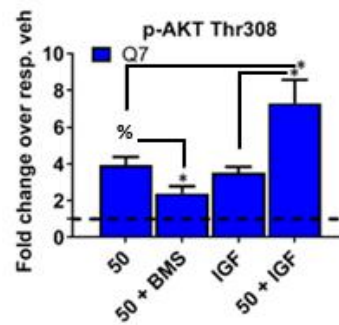

**E**

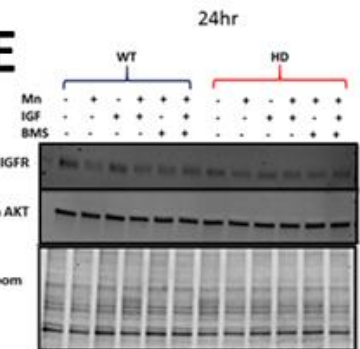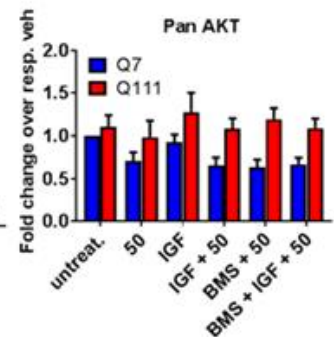

**A**

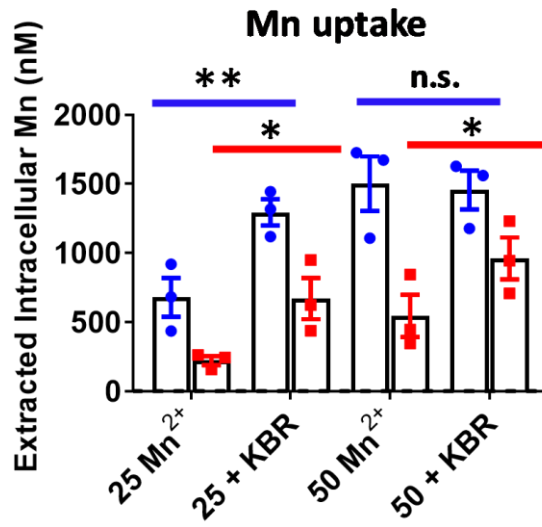

**B**

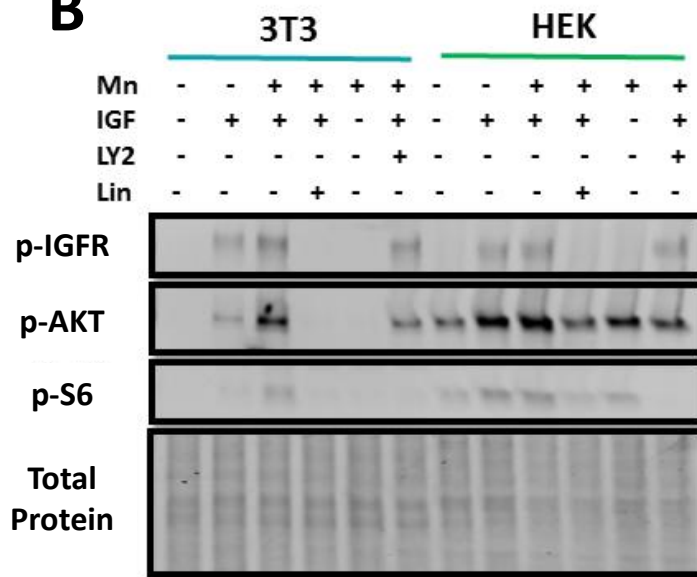

# Supp Figure 3

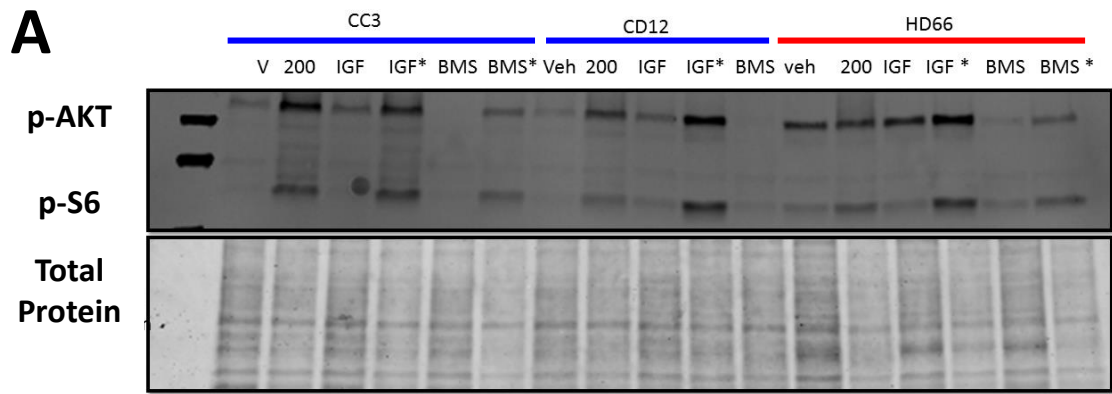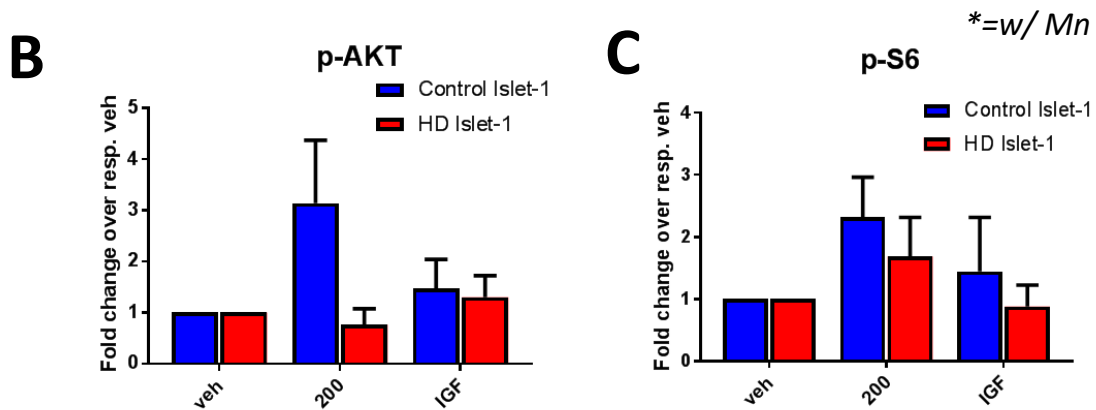

**D**

| Genotype | Probe  | Conditions | F (DFn, DFd)           | p-value          |
|----------|--------|------------|------------------------|------------------|
| WT       | p-AKT  | Mn alone   | (2,20)= 29.94          | <b>&lt;.0001</b> |
| WT       | p-IGFR | Mn alone   | (1.1236, 7.416)= 6.378 | <b>0.0334</b>    |
| WT       | p-S6   | Mn alone   | 2,12) = 8.008          | <b>0.0062</b>    |
| WT       | p-AKT  | Mn+IGF     | (2,20)=29.45           | <b>&lt;.0001</b> |
| WT       | p-IGFR | Mn+IGF     | (1.628, 13.02)=5.347   | <b>0.0249</b>    |
| WT       | p-S6   | Mn+IGF     | (2,12)=3.756           | <b>0.0541</b>    |
| HD       | p-AKT  | Mn alone   | (2, 18)= 15.43         | <b>&lt;.0001</b> |
| HD       | p-IGFR | Mn alone   | (1.034, 5.170)=2.607   | <b>0.1657</b>    |
| HD       | p-S6   | Mn alone   | (2,12)=.2178           | <b>0.8074</b>    |
| HD       | p-AKT  | Mn+IGF     | (2, 18)= 5.850         | <b>&lt;.0001</b> |
| HD       | p-IGFR | Mn+IGF     | (1.044, 3.132)=2.080   | <b>0.2432</b>    |
| HD       | p-S6   | Mn+IGF     | (2,12)=.8916           | <b>0.4355</b>    |

# Supp Figure 4

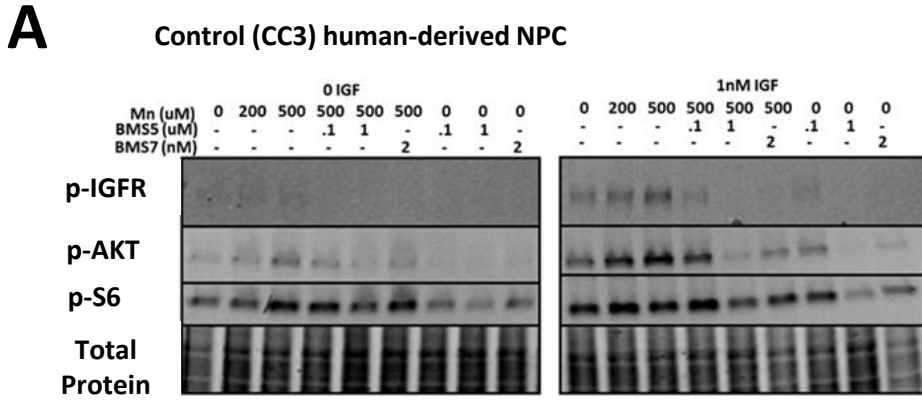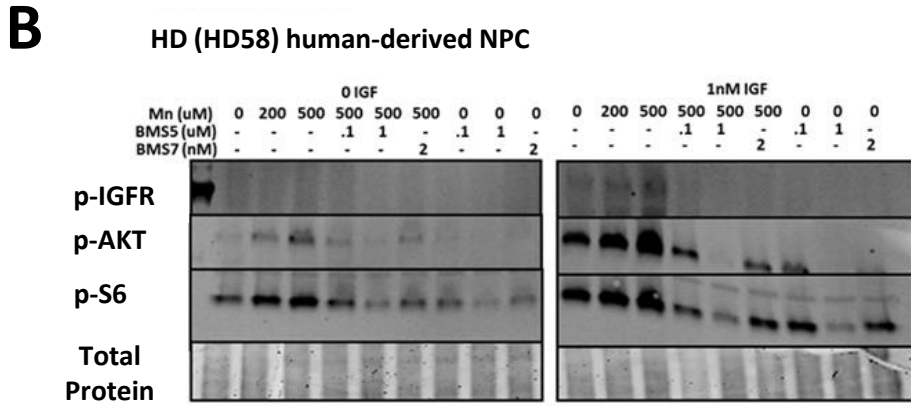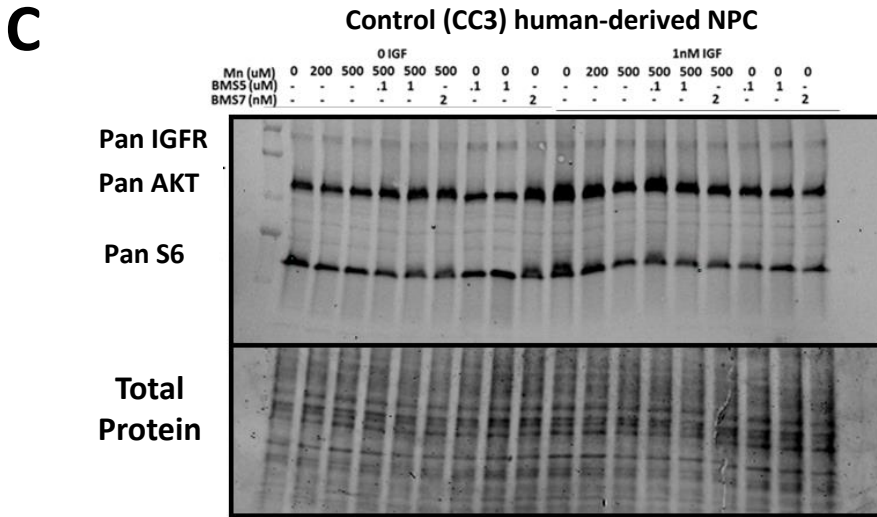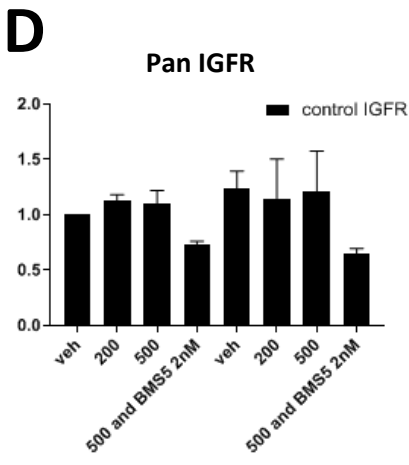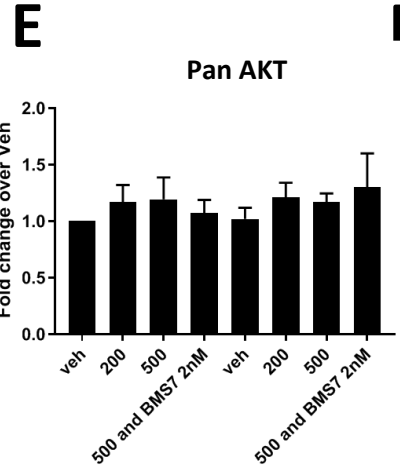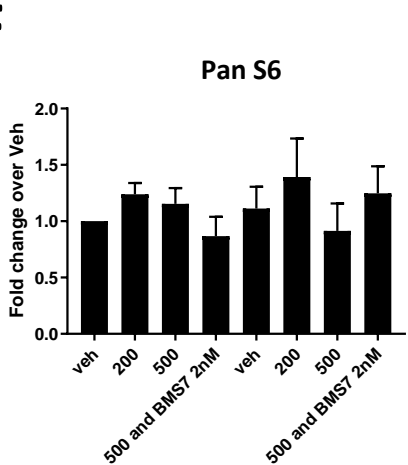



# Supp Figure 5

**A**

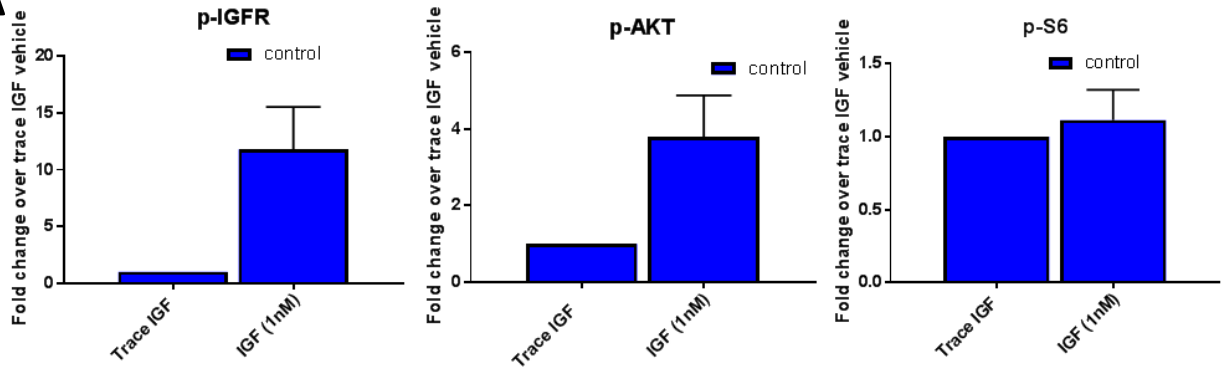

**B**

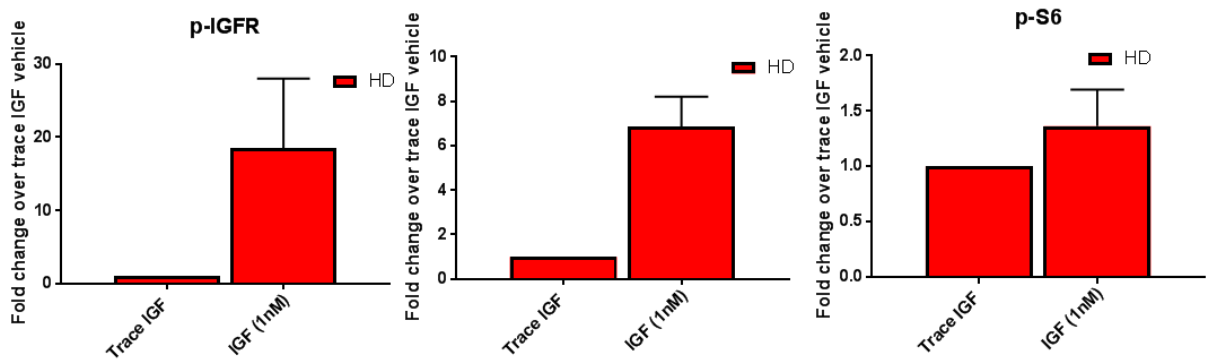

**C**

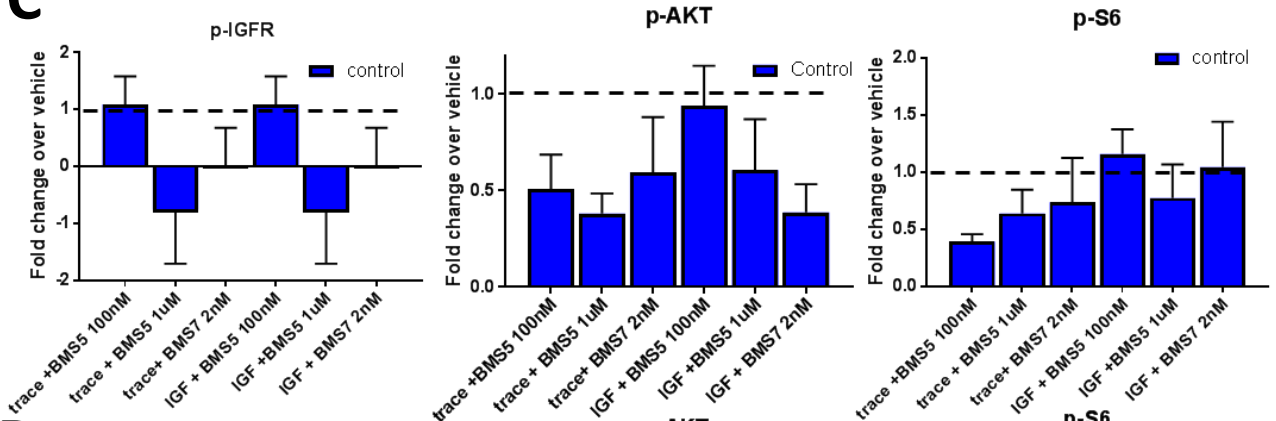

**D**

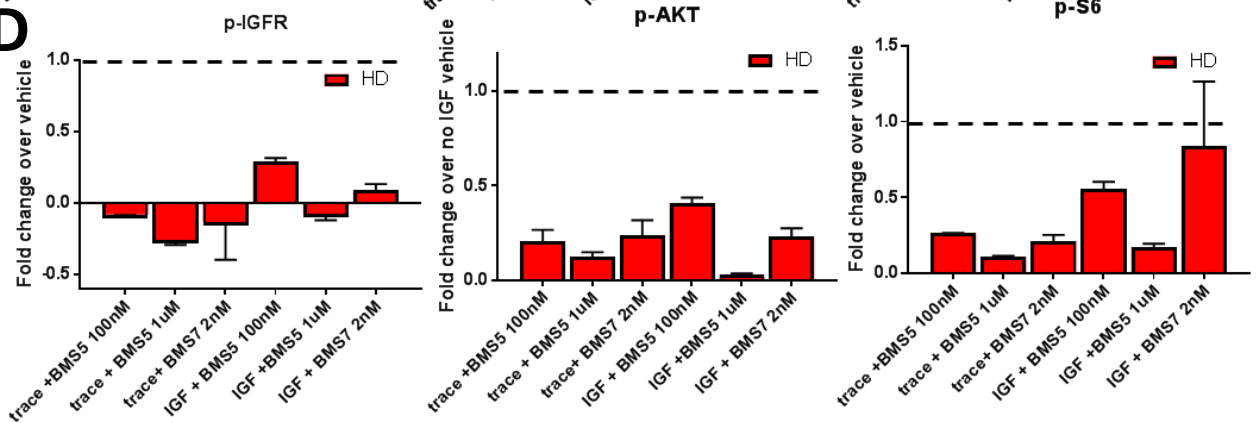

**A** **STHdh Q7/Q7 (Fig. 5)**

| Inhibitor                 | Reported IC50 (nM)   | Mn-induced pAKT inhibited (Mn)(%) | Mn-induced AKT inhibited (Mn+IGF)(%) |
|---------------------------|----------------------|-----------------------------------|--------------------------------------|
| <b>BMS-536924 (100nM)</b> | 100 (IGFR), 73 (IR)  | 45.5±12.9                         | 24.1±20.3                            |
| <b>Linsitinib (100nM)</b> | 35 (IGFR), 75 (IR)   | 71.1±10.9                         | 60.0±9.2                             |
| <b>Linsitinib (1uM)</b>   | 35 (IGFR), 75 (IR)   | 80.7±6.6                          | N/A                                  |
| <b>NVP-AEW541 (100nM)</b> | 150 (IGFR), 140 (IR) | 54.2±19.5                         | 1.8±28.57                            |
| <b>NVP-AEW541 (1uM)</b>   | 150 (IGFR), 140 (IR) | 65.4±32.7                         | N/A                                  |

**B** **Non-striatal cells (3T3, HEK293- Fig. 6; PC12- Fig 5)**

| Linsitinib (1uM) IC50- 35, 75nM (IGFR, IR) | Mn-induced pIGFR/IR inhibited (%) | Mn-induced pAKT inhibited (%) | Mn-induced pS6 inhibited (%) | AKT:IGFR/IR Correlation Score* | S6:IGFR/IR Correlation Score* |
|--------------------------------------------|-----------------------------------|-------------------------------|------------------------------|--------------------------------|-------------------------------|
| <b>3T3</b>                                 | 98.3±2.51                         | 97.2±0.56                     | 60.6±32.48                   | <b>98.8</b>                    | <b>61.7</b>                   |
| <b>HEK293</b>                              | 98.3±1.80                         | 40.5±22.1                     | 19.1±60.1                    | <b>41.1</b>                    | <b>19.4</b>                   |
| <b>PC12</b>                                | N/A                               | 128.2±42.0                    | 58.7±36.6                    | <b>N/A</b>                     | <b>N/A</b>                    |

\*Inhibition correlation score= (%pAKT or pS6 inhibition) / (%pIGFR/IR inhibition)

**C** **hiPSC-derived neuroprogenitors (Control- Fig. 8)**

| Inhibitor                 | Reported IC50 (nM)   | Mn-induced pIGFR/IR inhibited (%) | Mn-induced pAKT inhibited (%) | Mn-induced pS6 inhibited (%) | AKT:IGFR/IR Correlation Score* | S6:IGFR/IR Correlation Score* |
|---------------------------|----------------------|-----------------------------------|-------------------------------|------------------------------|--------------------------------|-------------------------------|
| <b>BMS-536924 (100nM)</b> | 100 (IGFR), 73 (IR)  | 59.9±8.9                          | 47.6±17.1                     | 8.6±37.4                     | <b>79.5</b>                    | <b>14.4</b>                   |
| <b>BMS-536924 (1uM)</b>   | 100 (IGFR), 73 (IR)  | 96.8±1.3                          | 71.5±18.0                     | 64.5±33.5                    | <b>73.9</b>                    | <b>66.6</b>                   |
| <b>BMS-754807 (2nM)</b>   | 1.8 (IGFR), 1.7 (IR) | 84.2±12.7                         | 57.0±24.4                     | 37.8±37.7                    | <b>67.7</b>                    | <b>44.9</b>                   |

\*Inhibition correlation score= (%pAKT or pS6 inhibition) / (%pIGFR/IR inhibition)



# Supp Figure 7

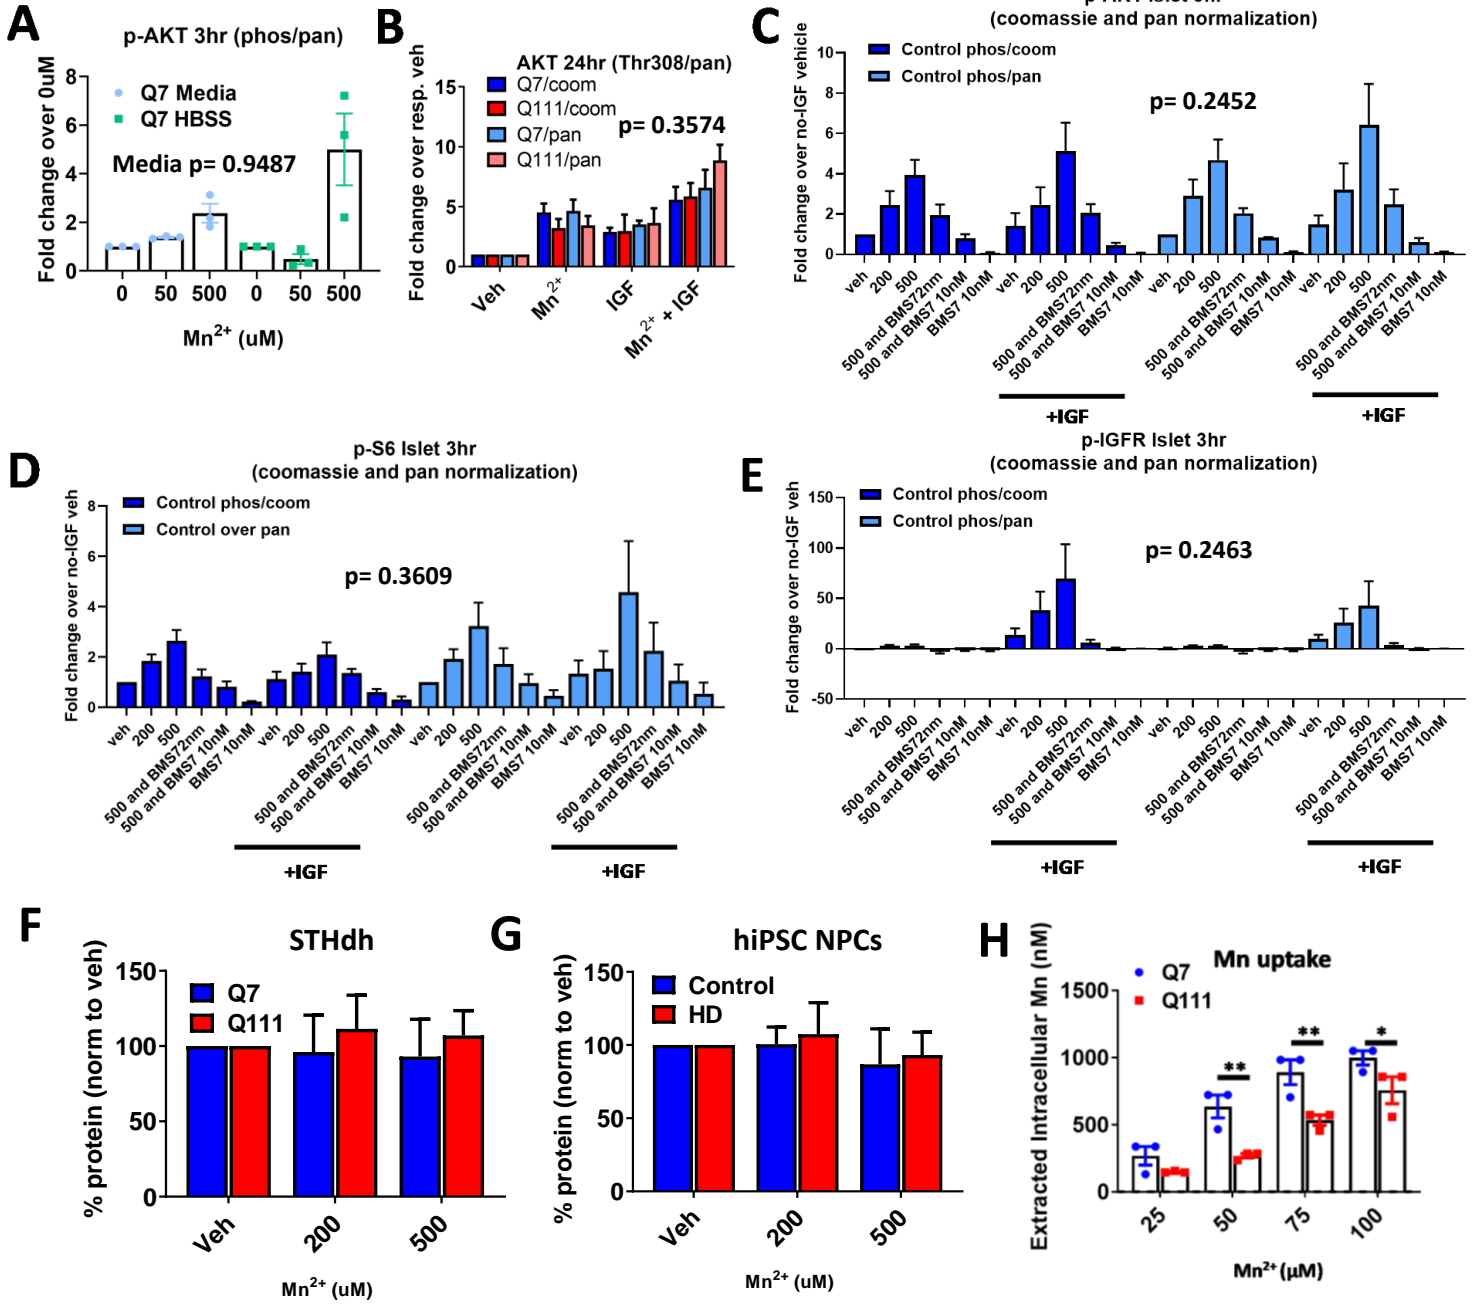

Supplement: NIHMS1545016-supplement-12035_2019_1824_MOESM1_ESM.pdf [file NIHMS1545016-supplement-12035_2019_1824_MOESM1_ESM.pdf]
